# Supplementary material
Source: MDPI journal article supplement (https://www.mdpi.com/1424-8247/16/1/76)
Supplement: s1 [file s1]

Supplementary file table S1: Validation parameters for the 53 selected compounds: mean and relative standard deviation (RSD, %) for matrix effect (ME), recovery (RE) and process efficiency (PE) (n=6), in both plasma (A) and whole blood (B).

A. Plasma

| Compounds             | Matrix effect (ME) |         | Recovery (RE) |         | Process efficiency (PE) |         |
|-----------------------|--------------------|---------|---------------|---------|-------------------------|---------|
|                       | mean               | RSD (%) | mean          | RSD (%) | mean                    | RSD (%) |
| Acetazolamide         | 0.96               | 8.23    | 1.11          | 3.63    | 0.86                    | 6.67    |
| Alprazolam            | 1.25               | 12.07   | 0.91          | 10.78   | 1.40                    | 18.42   |
| Amiodarone            | 1.21               | 7.49    | 1.05          | 5.75    | 1.15                    | 9.99    |
| Amitriptyline         | 1.06               | 12.19   | 1.08          | 4.00    | 0.98                    | 12.94   |
| Amlodipine            | 1.21               | 17.07   | 0.97          | 6.62    | 1.26                    | 16.44   |
| Aripiprazol           | 0.95               | 7.96    | 1.06          | 4.66    | 0.89                    | 8.53    |
| Atenolol              | 1.28               | 17.13   | 1.08          | 4.33    | 1.19                    | 18.58   |
| Atropine              | 0.89               | 8.80    | 1.06          | 4.36    | 0.85                    | 8.20    |
| Baclofen              | 1.74               | 6.80    | 1.22          | 6.07    | 1.43                    | 9.45    |
| Bisoprolol            | 0.95               | 6.25    | 1.08          | 4.15    | 0.89                    | 5.60    |
| Bromazepam            | 1.41               | 9.49    | 0.99          | 9.27    | 1.45                    | 17.47   |
| Bupivacaine           | 0.99               | 5.18    | 1.08          | 3.62    | 0.92                    | 2.85    |
| Buprenorphine         | 1.04               | 10.29   | 1.06          | 6.62    | 0.98                    | 11.96   |
| Citalopram            | 0.98               | 8.82    | 1.08          | 4.78    | 0.90                    | 8.29    |
| Clomipramine          | 0.95               | 11.67   | 1.10          | 5.28    | 0.86                    | 10.54   |
| Clonazepam            | 1.23               | 19.94   | 1.10          | 7.95    | 1.13                    | 19.23   |
| Clozapine             | 1.34               | 14.91   | 1.11          | 5.53    | 1.20                    | 13.52   |
| Cocaine               | 1.04               | 8.01    | 1.05          | 6.01    | 0.99                    | 9.01    |
| Cyamemazine           | 0.96               | 8.45    | 1.06          | 8.01    | 0.90                    | 10.38   |
| Diazepam              | 0.97               | 18.81   | 1.13          | 5.67    | 0.86                    | 15.12   |
| Fentanyl              | 1.06               | 8.14    | 1.06          | 4.77    | 1.00                    | 10.14   |
| Flupentixol           | 1.07               | 9.42    | 1.05          | 7.10    | 1.02                    | 6.72    |
| Furosemide            | 1.15               | 18.89   | 1.19          | 10.30   | 0.96                    | 11.17   |
| Glibenclamide         | 1.36               | 19.65   | 1.11          | 6.83    | 1.24                    | 13.59   |
| Haloperidol           | 1.05               | 10.77   | 1.09          | 7.78    | 0.97                    | 14.06   |
| Hydroxyzine           | 1.04               | 13.19   | 1.08          | 4.90    | 0.96                    | 11.64   |
| Ketamine              | 1.21               | 13.05   | 1.05          | 4.51    | 1.15                    | 13.03   |
| Lamotrigine           | 0.98               | 11.83   | 1.13          | 7.42    | 0.87                    | 11.10   |
| Levetiracetam         | 1.02               | 6.74    | 1.06          | 5.65    | 0.96                    | 8.10    |
| Lidocaine             | 1.15               | 11.04   | 1.06          | 3.75    | 1.08                    | 9.77    |
| Loxapine              | 1.25               | 13.58   | 1.11          | 5.55    | 1.14                    | 16.00   |
| MDA                   | 1.54               | 9.86    | 1.10          | 3.91    | 1.40                    | 12.36   |
| Metformin             | 0.15               | 18.06   | 1.16          | 4.94    | 0.12                    | 16.34   |
| Methadone             | 1.14               | 9.79    | 1.05          | 6.26    | 1.08                    | 10.54   |
| Mianserin             | 1.05               | 12.28   | 1.09          | 3.66    | 0.96                    | 12.07   |
| Midazolam             | 0.94               | 5.29    | 1.16          | 13.26   | 0.65                    | 10.86   |
| Mirtazapine           | 1.26               | 14.75   | 1.10          | 9.33    | 1.16                    | 18.93   |
| Morphine              | 2.28               | 13.41   | 1.13          | 3.83    | 2.01                    | 13.49   |
| Nefopam               | 1.10               | 10.30   | 1.09          | 5.12    | 1.00                    | 11.28   |
| Nordiazepam           | 1.10               | 10.30   | 1.09          | 5.12    | 1.00                    | 11.28   |
| O-demethylvenlafaxine | 1.01               | 8.64    | 1.07          | 3.10    | 0.94                    | 8.29    |
| Oxazepam              | 1.58               | 16.00   | 1.09          | 9.25    | 1.47                    | 18.59   |
| Paroxetine            | 0.95               | 10.22   | 1.09          | 7.84    | 0.88                    | 8.87    |

|             |      |       |      |      |      |       |
|-------------|------|-------|------|------|------|-------|
| Prazepam    | 0.91 | 19.01 | 1.05 | 4.70 | 0.86 | 15.05 |
| Propranolol | 1.01 | 6.76  | 1.08 | 3.97 | 0.94 | 5.38  |
| Risperidone | 2.01 | 26.19 | 1.11 | 6.72 | 1.81 | 14.51 |
| Sertraline  | 0.86 | 16.08 | 1.11 | 5.19 | 0.78 | 13.54 |
| Tiapride    | 0.99 | 9.40  | 1.06 | 4.28 | 0.94 | 9.00  |
| Tramadol    | 1.10 | 8.88  | 1.06 | 5.94 | 1.04 | 8.63  |
| Venlafaxine | 1.07 | 10.54 | 1.09 | 5.44 | 0.98 | 11.51 |
| Verapamil   | 0.99 | 7.68  | 1.04 | 4.77 | 0.95 | 7.47  |
| Warfarin    | 1.22 | 9.98  | 1.11 | 9.20 | 1.10 | 14.80 |
| Zolpidem    | 1.06 | 10.49 | 1.13 | 9.67 | 0.94 | 13.61 |

## B. Whole Blood

| Compounds     | Matrix effect (ME) |         | Recovery (RE) |         | Process efficiency (PE) |         |
|---------------|--------------------|---------|---------------|---------|-------------------------|---------|
|               | mean               | RSD (%) | mean          | RSD (%) | mean                    | RSD (%) |
| Acetazolamide | 0.92               | 8.65    | 1.15          | 12.90   | 0.80                    | 14.77   |
| Alprazolam    | 0.88               | 5.62    | 0.70          | 19.85   | 1.25                    | 19.96   |
| Amiodarone    | 0.96               | 2.28    | 1.15          | 15.39   | 0.83                    | 15.34   |
| Amitriptyline | 1.04               | 16.60   | 1.19          | 17.19   | 0.87                    | 17.79   |
| Amlodipine    | 1.12               | 10.64   | 1.14          | 14.69   | 0.99                    | 11.86   |
| Aripiprazol   | 0.94               | 10.20   | 1.09          | 16.77   | 0.87                    | 19.92   |
| Atenolol      | 1.93               | 14.66   | 1.15          | 5.12    | 1.68                    | 17.08   |
| Atropine      | 0.92               | 15.21   | 1.17          | 15.64   | 0.79                    | 18.31   |
| Baclofen      | 1.29               | 18.86   | 1.15          | 7.90    | 1.12                    | 18.60   |
| Bisoprolol    | 1.10               | 11.70   | 1.19          | 7.04    | 0.93                    | 13.94   |
| Bromazepam    | 1.08               | 16.47   | 1.09          | 19.83   | 1.00                    | 16.85   |
| Bupivacaine   | 0.93               | 14.54   | 1.19          | 17.30   | 0.78                    | 18.00   |
| Buprenorphine | 0.99               | 19.50   | 1.11          | 13.70   | 0.89                    | 19.17   |
| Citalopram    | 0.99               | 9.70    | 1.15          | 13.99   | 0.86                    | 18.42   |
| Clomipramine  | 0.95               | 13.12   | 1.14          | 16.18   | 0.83                    | 17.27   |
| Clonazepam    | 1.05               | 17.09   | 1.13          | 16.65   | 0.93                    | 16.76   |
| Clozapine     | 1.15               | 10.61   | 1.15          | 9.46    | 1.00                    | 17.28   |
| Cocaine       | 1.02               | 16.86   | 1.17          | 13.72   | 0.87                    | 17.73   |
| Cyamemazine   | 0.93               | 11.55   | 1.02          | 9.78    | 0.92                    | 14.35   |
| Diazepam      | 1.02               | 18.39   | 1.10          | 11.31   | 0.93                    | 18.34   |
| Fentanyl      | 1.02               | 16.47   | 1.20          | 18.17   | 0.85                    | 18.64   |
| Flupentixol   | 1.01               | 13.75   | 0.93          | 17.88   | 1.09                    | 19.61   |
| Furosemide    | 1.06               | 5.83    | 1.11          | 18.01   | 0.96                    | 15.99   |
| Glibenclamide | 0.83               | 10.47   | 1.05          | 19.25   | 0.79                    | 16.34   |
| Haloperidol   | 0.98               | 16.25   | 1.08          | 10.96   | 0.91                    | 17.67   |
| Hydroxyzine   | 1.04               | 13.20   | 1.17          | 19.37   | 0.89                    | 18.01   |
| Ketamine      | 1.20               | 17.90   | 1.16          | 12.52   | 1.03                    | 16.33   |
| Lamotrigine   | 1.00               | 15.41   | 1.15          | 11.02   | 0.87                    | 15.40   |
| Levetiracetam | 1.01               | 9.21    | 1.17          | 11.61   | 0.87                    | 11.81   |
| Lidocaine     | 1.15               | 16.28   | 1.18          | 10.99   | 0.98                    | 16.90   |
| Loxapine      | 1.20               | 19.69   | 1.22          | 19.52   | 0.98                    | 19.07   |
| MDA           | 1.68               | 14.42   | 1.23          | 5.28    | 1.37                    | 17.42   |
| Metformin     | 0.15               | 12.96   | 1.30          | 13.15   | 0.11                    | 24.98   |
| Methadone     | 1.10               | 19.14   | 1.17          | 16.94   | 0.94                    | 17.68   |
| Mianserin     | 1.06               | 14.47   | 1.21          | 19.53   | 0.84                    | 17.22   |
| Midazolam     | 0.92               | 19.24   | 1.11          | 12.60   | 0.83                    | 14.05   |

|                       |      |       |      |       |      |       |
|-----------------------|------|-------|------|-------|------|-------|
| Mirtazapine           | 1.24 | 19.45 | 1.12 | 6.95  | 1.11 | 13.83 |
| Morphine              | 2.17 | 18.33 | 1.18 | 19.64 | 1.84 | 14.51 |
| Nefopam               | 1.06 | 17.93 | 1.15 | 11.68 | 0.92 | 15.40 |
| Nordiazepam           | 1.24 | 17.58 | 1.00 | 17.77 | 1.24 | 19.70 |
| O-demethylvenlafaxine | 1.04 | 11.28 | 1.10 | 5.79  | 0.95 | 14.53 |
| Oxazepam              | 1.19 | 11.87 | 1.08 | 19.41 | 1.10 | 16.03 |
| Paroxetine            | 0.98 | 17.75 | 1.16 | 11.75 | 0.85 | 16.59 |
| Prazepam              | 0.88 | 11.64 | 1.08 | 10.17 | 0.82 | 16.23 |
| Propranolol           | 0.99 | 17.45 | 1.10 | 10.94 | 0.90 | 16.51 |
| Risperidone           | 1.52 | 15.58 | 1.18 | 18.32 | 1.29 | 16.99 |
| Sertraline            | 0.75 | 16.13 | 1.05 | 15.51 | 0.71 | 18.26 |
| Tiaprider             | 0.75 | 16.13 | 1.13 | 5.98  | 0.66 | 19.84 |
| Tramadol              | 1.18 | 14.32 | 1.13 | 6.43  | 1.04 | 12.19 |
| Venlafaxine           | 1.02 | 18.91 | 1.14 | 12.75 | 0.90 | 14.91 |
| Verapamil             | 0.93 | 19.90 | 1.14 | 19.68 | 0.82 | 17.78 |
| Warfarin              | 1.04 | 11.93 | 1.20 | 19.47 | 0.87 | 19.80 |
| Zolpidem              | 1.02 | 18.11 | 1.15 | 6.04  | 0.88 | 13.91 |

| Compounds             | Helfer <i>et al</i>                                      | Roche <i>et al</i>                  | Joye <i>et al</i>                 | The present assay                   |
|-----------------------|----------------------------------------------------------|-------------------------------------|-----------------------------------|-------------------------------------|
|                       | LOI (µg/L)<br>in plasma<br>(precipitation/turboflo<br>w) | LOI (µg/L) in<br>plasma/whole blood | LOI (µg/L) in<br>dried blood spot | LOI (µg/L) in<br>plasma/whole blood |
| 6-monoacetylmorphine  | NA                                                       | NA                                  | 5                                 | 0.98/0.98                           |
| 7 aminoclonazepam     | NA                                                       | NA                                  | 10                                | 0.78/0.78                           |
| 9-hydroxyrisperidone  | NA                                                       | NA                                  | NA                                | 0.5/1                               |
| acebutolol            | NA                                                       | NA                                  | NA                                | 1/1                                 |
| N-acetyl-acebutolol   | NA                                                       | NA                                  | NA                                | 1/1                                 |
| acenocoumarol         | NA                                                       | NA                                  | NA                                | 5/5                                 |
| acepromazine          | NA                                                       | NA                                  | NA                                | 0.5/5                               |
| acetaminophen         | NA                                                       | 55.6/60.1                           | NA                                | NA                                  |
| acetazolamide         | NA                                                       | NA                                  | NA                                | 100/100                             |
| alimemazine           | NA                                                       | NA                                  | NA                                | 0.5/1                               |
| aliskiren             | 10/10                                                    | NA                                  | NA                                | NA                                  |
| alprazolam            | NA                                                       | NA                                  | NA                                | 0.78/1.56                           |
| altizide              | NA                                                       | NA                                  | NA                                | 10/10                               |
| amiloride             | NA                                                       | NA                                  | NA                                | 10/10                               |
| amiodarone            | 1000/100                                                 | NA                                  | NA                                | 10/10                               |
| amisulpride           | NA                                                       | NA                                  | NA                                | 0.5/0.5                             |
| amitriptyline         | 1/1                                                      | NA                                  | 1                                 | 0.5/0.5                             |
| amlodipine            | 10/1                                                     | NA                                  | NA                                | 5/5                                 |
| amphetamine           | 100/10                                                   | NA                                  | 10                                | 1.95/1.95                           |
| anhydromethylecgonine | NA                                                       | NA                                  | NA                                | 7.81/7.81                           |
| aripiprazole          | NA                                                       | NA                                  | NA                                | 1/1                                 |
| atenolol              | NA                                                       | 2.3/0.9                             | NA                                | 10/1                                |
| atropine              | NA                                                       | NA                                  | NA                                | 1/10                                |
| baclofene             | NA                                                       | NA                                  | NA                                | 40/40                               |
| bendroflumethiazide   | NA                                                       | NA                                  | NA                                | 10/10                               |
| benzoylecgonine       | NA                                                       | NA                                  | 1                                 | 0.98/0.98                           |
| benzylpiperazine      | NA                                                       | NA                                  | 1                                 | NA                                  |
| bezafibrate           | 1000/10                                                  | NA                                  | NA                                | NA                                  |
| bisoprolol            | 10/0.1                                                   | NA                                  | NA                                | 1/1                                 |
| bromazepam            | NA                                                       | NA                                  | NA                                | 1.98/7.81                           |
| bumetanide            | NA                                                       | NA                                  | NA                                | 10/10                               |
| bupivacaine           | NA                                                       | NA                                  | NA                                | 1/1                                 |
| buprenorphine         | NA                                                       | NA                                  | NA                                | 1/1                                 |
| bupropion             | NA                                                       | NA                                  | NA                                | 0.5/0.5                             |
| butylone              | NA                                                       | NA                                  | 1                                 | NA                                  |
| canrenone             | NA                                                       | NA                                  | NA                                | 10/10                               |
| carbamazepine         | NA                                                       | NA                                  | 1                                 | NA                                  |
| cefazoline            | NA                                                       | NA                                  | NA                                | 2000/2000                           |
| cefoxitine            | NA                                                       | NA                                  | NA                                | 400/400                             |
| ceftazidime           | NA                                                       | NA                                  | NA                                | 400/400                             |

|                      |           |         |    |           |
|----------------------|-----------|---------|----|-----------|
| celiprolol           | NA        | NA      | NA | 1/1       |
| chlordiazepoxide     | NA        | NA      | NA | 0.99/0.99 |
| chlorophacinone      | NA        | NA      | NA | 50/50     |
| chloroquine          | NA        | NA      | NA | 20/20     |
| chlorpromazine       | NA        | NA      | NA | 2/1       |
| ciprofloxacin        | NA        | NA      | NA | 20/20     |
| citalopram           | NA        | NA      | 1  | 0.5/0.5   |
| clindamycin          | NA        | NA      | NA | 20/20     |
| clobazam             | NA        | NA      | NA | 0.99/1.98 |
| clomipramine         | NA        | NA      | NA | 1/2       |
| clonazepam           | NA        | NA      | NA | 25/25     |
| clotiazepam          | NA        | NA      | NA | 0.99/1.98 |
| clozapine            | NA        | 1.6/0.6 | NA | 0.5/0.5   |
| cocaethylene         | NA        | NA      | NA | 0.98/0.98 |
| cocaine              | NA        | NA      | 1  | 0.98/0.98 |
| codeine              | 10/10     | NA      | 5  | 3.91/3.91 |
| coumatetralyl        | NA        | NA      | NA | 50/50     |
| cyamemazine          | NA        | NA      | NA | 1/0.5     |
| declomipramine       | NA        | NA      | NA | 0.5/0.5   |
| demethylcitalopram   | NA        | NA      | NA | 0.5/0.5   |
| desipramine          | NA        | NA      | NA | 1/2       |
| desmethylnefopam     | NA        | NA      | NA | 0.5/0.5   |
| desmethylzopiclone   | NA        | NA      | NA | 1.56/1.56 |
| dextrometorphan      | NA        | NA      | NA | 0.98/0.98 |
| diazepam             | 1/0.1     | 1.7/1   | 1  | 0.99/0.99 |
| diclofenac           | 1000/100  | NA      | NA | 1/1       |
| didemethylcitalopram | NA        | NA      | NA | 50/50     |
| difenacoum           | NA        | NA      | NA | 50/50     |
| dihydrocodeine       | NA        | NA      | NA | 0.98/0.98 |
| diltiazem            | NA        | NA      | NA | 0.5/0.5   |
| diphenandione        | NA        | NA      | NA | 50/50     |
| diphenhydramine      | 1/0.1     | NA      | NA | NA        |
| dosulepine           | NA        | NA      | NA | 0.5/0.5   |
| doxazosin            | 1/1       | NA      | NA | NA        |
| doxepine             | NA        | NA      | NA | 0.5/0.5   |
| estazolam            | NA        | NA      | NA | 0.99/0.99 |
| ethylmorphine        | NA        | NA      | NA | 1.95/1.95 |
| fentanyl             | NA        | 0.4/0.3 | NA | 1/1       |
| flecaine             | NA        | NA      | NA | 1/1       |
| fluconazole          | NA        | NA      | NA | 500/500   |
| flufenamic acid      | 1000/1000 | NA      | NA | NA        |
| fluindione           | NA        | NA      | NA | 500/500   |
| fluoxetine           | NA        | NA      | 1  | NA        |
| flupentixol          | NA        | NA      | NA | 0.5/0.5   |

|                      |        |         |    |           |
|----------------------|--------|---------|----|-----------|
| fluphenazine         | NA     | NA      | NA | 0.5/0.5   |
| fluvoxamine          | NA     | NA      | NA | 1/2       |
| furosemide           | NA     | NA      | NA | 10/10     |
| gabapentine          | NA     | NA      | 20 | NA        |
| glibenclamide        | NA     | NA      | NA | 2.5/5     |
| gliclazide           | NA     | NA      | NA | 5/5       |
| glimepiride          | NA     | NA      | NA | 10/10     |
| glipizide            | NA     | NA      | NA | 5/5       |
| haloperidol          | NA     | 1.6/0.6 | 1  | 0.5/0.5   |
| heroin               | NA     | NA      | NA | 0.98/0.98 |
| hydrochlorothiazide  | 100/10 | NA      | NA | NA        |
| hydroxychloroquine   | NA     | NA      | NA | 20/20     |
| hydroxy-Itraconazole | NA     | NA      | NA | 200/200   |
| hydroxymidazolam     | NA     | NA      | 1  | NA        |
| hydroxyzine          | NA     | NA      | NA | 0.99/0.99 |
| imipramine           | NA     | 1.7/0.7 | NA | 0.5/0.5   |
| indapamide           | NA     | NA      | NA | 10/10     |
| itraconazole         | NA     | NA      | NA | 200/200   |
| ivabradine           | 1/0.1  | NA      | NA | NA        |
| ketamin              | NA     | NA      | 5  | 10/10     |
| labetalol            | NA     | NA      | NA | 1/1       |
| lamotrigine          | NA     | NA      | NA | 10/10     |
| levetiracetam        | 10/10  | NA      | NA | 100/100   |
| levomepromazine      | NA     | NA      | NA | 0.5/1     |
| lidocaine            | NA     | NA      | NA | 1/1       |
| linezolid            | NA     | NA      | NA | 100/100   |
| loprazolam           | NA     | NA      | NA | 3.13/3.13 |
| lorazepam            | NA     | NA      | NA | 3.13/12.5 |
| lormetazepam         | NA     | NA      | NA | 3.13/12.5 |
| Losartan             | 10/1   | NA      | NA | NA        |
| loxapine             | NA     | NA      | NA | 0.5/0.5   |
| LSD                  | NA     | NA      | NA | 0.39/0.39 |
| maprotiline          | NA     | NA      | NA | 0.5/0.5   |
| MBDB                 | NA     | NA      | NA | 0.98/0.98 |
| MDA                  | NA     | NA      | NA | 6.25/6.25 |
| MDEA                 | NA     | NA      | NA | 0.98/0.98 |
| MDMA                 | NA     | NA      | 1  | 1.95/1.95 |
| mephedrone           | NA     | NA      | NA | 1.95/1.95 |
| mepivacaine          | NA     | NA      | NA | 1/1       |
| mequitazine          | NA     | NA      | NA | 0.5/0.5   |
| meropenem            | NA     | NA      | NA | 500/500   |
| metamphetamine       | NA     | 1.8/1   | 1  | 0.98/0.8  |
| metformine           | NA     | NA      | NA | 100/100   |
| methadone            | NA     | NA      | 1  | 0.98/0.98 |

|                       |        |            |    |           |
|-----------------------|--------|------------|----|-----------|
| methedrone            | NA     | NA         | 1  | NA        |
| methylclothiazide     | NA     | NA         | NA | 10/10     |
| methylecgonine        | NA     | NA         | NA | 62.5/62.5 |
| methyllone            | NA     | NA         | 1  | 0.98/0.98 |
| methylprednisolone    | NA     | NA         | NA | 10/20     |
| metoclopramide        | NA     | NA         | NA | 0.5/1     |
| metoprolol            | NA     | NA         | NA | 10/10     |
| mianserine            | NA     | NA         | 1  | 0.5/0.5   |
| midazolam             | NA     | 1.1/2.6    | 1  | 0.99/0.99 |
| milnacipran           | NA     | NA         | NA | 0.5/0.5   |
| minoxidil             | 1/1    | NA         | NA | NA        |
| mirtazapine           | NA     | NA         | NA | 0.5/0.5   |
| moclobemide           | NA     | NA         | NA | 0.5/0.5   |
| molsidomine           | 1/1    | NA         | NA | NA        |
| morphine              | 100/10 | 0.9/1.3    | 10 | 10/10     |
| moxonidine            | 1/1    | NA         | NA | NA        |
| nadolol               | NA     | NA         | NA | 1/1       |
| nalbuphine            | NA     | NA         | NA | 0.98/0.98 |
| naloxone              | NA     | NA         | NA | 0.98/0.98 |
| nefopam               | NA     | NA         | NA | 0.5/0.5   |
| nicardipine           | NA     | NA         | NA | 0.5/0.5   |
| nifedipine            | NA     | NA         | NA | 2/2       |
| nitrazepam            | NA     | NA         | NA | 0.78/6.25 |
| norbuprenorphine      | NA     | NA         | NA | 3.13/3.13 |
| norclobazam           | NA     | NA         | NA | 4.9/9.8   |
| norclozapine          | NA     | NA         | NA | 0.5/0.5   |
| norcodeine            | NA     | NA         | NA | 1.95/1.95 |
| norcyamemazine        | NA     | NA         | NA | 0.5/1     |
| nordiazepam           | NA     | NA         | NA | 0.99/1.95 |
| nordoxepine           | NA     | NA         | NA | 0.5/0.5   |
| norLSD                | NA     | NA         | NA | 0.39/0.39 |
| norpropoxyphene       | NA     | NA         | NA | 1.95/1.95 |
| nortriptyline         | NA     | NA         | NA | 1/0.5     |
| N-demethylvenlafaxine | NA     | NA         | NA | 0.5/0.5   |
| O-demethylvenlafaxine | NA     | NA         | NA | 1/1       |
| ofloxacin             | NA     | NA         | NA | 20/20     |
| olanzapine            | NA     | NA         | NA | 0.5/1     |
| oxazepam              | NA     | NA         | NA | 0.99/0.99 |
| oxycodone             | NA     | NA         | NA | 0.98/0.98 |
| paroxetine            | NA     | NA         | NA | 0.5/0.5   |
| phenobarbital         | NA     | 116.6/88.8 | NA | non       |
| phenprocoumon         | 10/1   | NA         | NA | 0         |
| pholcodine            | NA     | NA         | NA | 7.81/7.81 |
| pindolol              | NA     | NA         | NA | 1/1       |

|                |          |         |    |           |
|----------------|----------|---------|----|-----------|
| pipamperone    | NA       | NA      | NA | 0.5/0.5   |
| pipothiazine   | NA       | NA      | NA | 0.5/1     |
| posaconazole   | NA       | NA      | NA | 200/200   |
| prazepam       | NA       | NA      | NA | 0.99/3.91 |
| prednisolone   | NA       | NA      | NA | 10/10     |
| probenicid     | NA       | NA      | NA | 10/10     |
| promethazine   | 1/1      | NA      | NA | 0.5/0.5   |
| propoxyphene   | NA       | NA      | NA | 0.98/0.98 |
| propranolol    | NA       | NA      | NA | 1/1       |
| quetiapine     | 1/0.1    | NA      | 1  | 0.5/1     |
| ramipril       | 10/10    | NA      | NA | NA        |
| repaglinide    | NA       | NA      | NA | 2.5/2.5   |
| risperidone    | 1/1      | NA      | 1  | 0.5/0.5   |
| ropivacaine    | NA       | NA      | NA | 1/1       |
| sertraline     | 1/1      | NA      | NA | 0.5/2     |
| sotalol        | NA       | NA      | NA | 1/10      |
| spironolactone | 100/10   | NA      | NA | NA        |
| temazepam      | NA       | NA      | NA | 0.99/1.98 |
| THC-COOH       | NA       | NA      | 10 | NA        |
| thiopental     | 1000/100 | NA      | NA | NA        |
| tianeptine     | NA       | NA      | NA | 0.5/1     |
| tiapride       | NA       | NA      | NA | 1/0.5     |
| timolol        | NA       | NA      | NA | 1/1       |
| torasemide     | 1/1      | NA      | NA | NA        |
| tramadol       | NA       | 1.7/1.3 | NA | 1/1       |
| triamptere     | 0.1/0.1  | NA      | NA | 10/10     |
| trimipramine   | NA       | NA      | 5  | 0.5/1     |
| venlafaxine    | NA       | 1.1/1   | NA | 0.5/0.5   |
| verapamil      | 1/0.1    | NA      | NA | 0.5/0.5   |
| voriconazole   | NA       | NA      | NA | 200/200   |
| warfarine      | NA       | NA      | NA | 10/10     |
| zolpidem       | NA       | 1.3/1.1 | 1  | 0.99/0.99 |
| zopiclone      | NA       | NA      | NA | 0.78/6.25 |
| zuclopentixol  | NA       | NA      | NA | 0.5/1     |

Supplementary file Table S2: limits of identification (µg/L) for both matrices, with a large panel of 179 compounds and comparison between our assay and previously published studies using UHPLC–HRMS technology





Supplementary file Table S3: Spectra reproducibility for both plasma and whole blood

| Compounds             | 10-fold LOI |         | 3-fold-LOI |         |
|-----------------------|-------------|---------|------------|---------|
|                       | Mean        | RSD (%) | Mean       | RSD (%) |
| Acetazolamide         | 851.3       | 2.8     | 813.3      | 4.6     |
| Alprazolam            | 448.5       | 14.1    | 417.3      | 7.3     |
| Amiodarone            | 903.0       | 1.3     | 891.3      | 1.7     |
| Amitriptyline         | 750.7       | 1.1     | 755.2      | 0.7     |
| Amlodipine            | 830.7       | 1.4     | 434.5      | 22.9    |
| Aripiprazol           | 958.2       | 1.1     | 962.0      | 0.8     |
| Atenolol              | 778.5       | 2.9     | 779.3      | 2.6     |
| Atropine              | 719.3       | 2.1     | 718.8      | 4.2     |
| Baclofen              | 117.3       | 7.3     | 127.8      | 4.8     |
| Bisoprolol            | 936.3       | 1.1     | 938.8      | 0.6     |
| Bromazepam            | 732.5       | 0.8     | 727.0      | 2.2     |
| Bupivacaine           | 380.5       | 19.5    | 312.0      | 14.8    |
| Buprenorphine         | 525.3       | 9.6     | 527.2      | 4.5     |
| Citalopram            | 819.6       | 10.8    | 799.2      | 12.3    |
| Clomipramine          | 316.5       | 12.7    | 244.7      | 8.3     |
| Clonazepam            | 496.5       | 14.1    | 468.2      | 18.9    |
| Clozapine             | 699.8       | 7.1     | 695.7      | 3.5     |
| Cocaine               | 863.0       | 2.1     | 864.5      | 2.4     |
| Cyamemazine           | 738.3       | 4.6     | 757.0      | 1.3     |
| Diazepam              | 453.2       | 3.2     | 438.5      | 6.3     |
| Fentanyl              | 656.7       | 7.2     | 636.5      | 8.5     |
| Flupentixol           | 920.8       | 1.7     | 912.2      | 1.4     |
| Furosemide            | 852.2       | 2.4     | 822.3      | 9.5     |
| Glibenclamide         | 959.3       | 1.5     | 943.0      | 1.2     |
| Haloperidol           | 619.0       | 2.4     | 603.8      | 6.4     |
| Hydroxyzine           | 839.2       | 4.4     | 829.8      | 3.6     |
| Ketamine              | 757.0       | 2.1     | 767.5      | 2.8     |
| Lamotrigine           | 575.2       | 6.9     | 601.3      | 2.4     |
| Levetiracetam         | 45.5        | 1.49    | 46.7       | 25.8    |
| Lidocaine             | 346.5       | 4.7     | 323.0      | 7.2     |
| Loxapine              | 739.3       | 6.3     | 680.7      | 18.9    |
| MDA                   | 345.3       | 48.5    | 403.3      | 7.1     |
| Metformin             | 155.7       | 18.1    | 142.4      | 15.2    |
| Methadone             | 870.8       | 1.8     | 869.2      | 1.3     |
| Mianserine            | 672.2       | 1.5     | 657.3      | 4.1     |
| Midazolam             | 710.6       | 12.5    | 781.5      | 2.7     |
| Mirtazapine           | 347.2       | 9.5     | 347.2      | 5.6     |
| Morphine              | 338.3       | 13.4    | 311.0      | 6.6     |
| Nefopam               | 485.3       | 8.3     | 428.5      | 11.7    |
| Nordiazepam           | 715.2       | 4.3     | 707.8      | 3.9     |
| O-demethylvenlafaxine | 561.8       | 11.1    | 604.8      | 7.1     |
| Oxazepam              | 796.7       | 1.4     | 788.8      | 2.4     |
| Paroxetine            | 881.2       | 4.1     | 853.3      | 7.0     |
| Prazepam              | 719.7       | 16.5    | 557.0      | 14.7    |
| Propranolol           | 821.2       | 2.6     | 834.5      | 4.3     |
| Risperidone           | 822.3       | 4.4     | 791.7      | 6.9     |
| Sertraline            | 612.5       | 15.1    | 648.7      | 11.8    |
| Tiapride              | 776.5       | 1.7     | 790.3      | 1.8     |
| Tramadol              | 259.3       | 19.5    | 246.8      | 19.8    |

|             |       |     |       |     |
|-------------|-------|-----|-------|-----|
| Trazodone   | 733.3 | 1.6 | 738.5 | 3.0 |
| Venlafaxine | 757.7 | 3.7 | 766.5 | 4.8 |
| Verapamil   | 960.2 | 2.2 | 973.8 | 0.3 |
| Warfarine   | 763.7 | 2.3 | 782.0 | 2.5 |
| Zolpidem    | 541.5 | 3.7 | 548.5 | 2.2 |

Supplementary table S4: Screening results for internal spiked plasma control (sample 1) and proficiency test (sample 2, 3 and 4).

| Sample | Compounds          | Spiked concentration (µg.L <sup>-1</sup> ) | Therapeutic concentrations (µg.L <sup>-1</sup> ) (45,46) | Identification |
|--------|--------------------|--------------------------------------------|----------------------------------------------------------|----------------|
| 1      | Amlodipine         | 10                                         | 3-15                                                     | Detected       |
|        | Atenolol           | 100                                        | 100-2 000                                                | Detected       |
|        | Bupivacaine        | 100                                        | 250-200                                                  | Detected       |
|        | Cocaine            | 100                                        | 50-300                                                   | Detected       |
|        | Cyamemazine        | 100                                        | 50-400                                                   | Detected       |
|        | Furosemide         | 1 000                                      | 2 000-5 000                                              | Detected       |
|        | Glibenclamide      | 100                                        | 50-200                                                   | Detected       |
|        | Haloperidol        | 10                                         | 5-17                                                     | Detected       |
|        | Ketamine           | 1 000                                      | 1 000-6 000                                              | Detected       |
|        | Levetiracetam      | 1 000                                      | 3 000-40 000                                             | Detected       |
|        | Metformin          | 500                                        | 100-1 300                                                | Detected       |
|        | Morphine           | 100                                        | 10-100                                                   | Detected       |
|        | Prazepam           | 100                                        | 200-700                                                  | Detected       |
|        | Venlafaxine        | 100                                        | 100-400                                                  | Detected       |
|        | Warfarine          | 1 000                                      | 1 000-7 000                                              | Detected       |
| 2      | Baclofen           | 177                                        | 80-400                                                   | Detected       |
|        | Oxazepam           | 1 951                                      | 200-1 500                                                | Detected       |
|        | Citalopram         | 196                                        | 50-110                                                   | Detected       |
|        | Demethylcitalopram | 119                                        | Not available                                            | Detected       |
|        | Mephedrone         | 52                                         | Not available                                            | Detected       |
| 3      | Amisulpride        | Not available                              | 100-320                                                  | Detected       |
|        | Bisoprolol         | 450                                        | 10-100                                                   | Detected       |
| 4      | Tramadol           | 2 181                                      | 10-1000                                                  | Detected       |
|        | Rivaroxaban        | Not available                              | Not available                                            | Detected       |
